# Supplementary material for: Development and validation of a subject-specific integrated finite element musculoskeletal model of human trunk with ergonomic and clinical applications
Source: Research Square preprint supplement (doi:10.21203/rs.3.rs-6932168/v1), 2025-07-25
Supplement: Supplementary file 1 [file b924437bf8ac3d6225f50dbc.docx]

# Supplementary Materials

Table S1: Material properties of the finite element-musculoskeletal model as well as the L4-L5 sub-model

| Component | Material property | Reference |
| --- | --- | --- |
| Annulus fibrosus matrix | Incompressible Mooney-Rivlin hyperelastic model (C1 = 0.14 MPa; C2 = 0.035 MPa) | (F Ghezelbash et al., 2021) |
| Annulus fibrosus collagen fiber | Nonlinear stress-strain curves | (Shirazi-Adl et al., 1986) |
| Ligaments | Nonlinear stress-strain curves | (Shirazi-Adl, 1994c; Shirazi-Adl et al., 1986) |
| Cortical bone | Linear elastic (E = 12000 MPa; ν = 0.3) | (Goto et al., 2003; Schmidt et al., 2007b) |
| Cancellous bone | Linear elastic (E = 200 MPa; ν = 0.315) | (Goto et al., 2003; Schmidt et al., 2007b) |
| Posterior elements | Linear elastic (E = 3500 MPa; ν = 0.25) | (Huang et al., 2016; Shirazi-Adl, 1994c; Shirazi-Adl et al., 1986) |
| Cage | Linear elastic (E = 3500 MPa; ν = 0.3) | (Huang et al., 2016) |
| Graft | Linear elastic (E = 50 MPa; ν = 0.2) | (Huang et al., 2016) |
| Instrumentation | Linear elastic, titanium (E = 110000 MPa; ν = 0.2) | (Huang et al., 2016) |

## L4-L5 Sub-Model

In the musculoskeletal model, all vertebrae were simulated as a collection of two rigid bodies attached by two flexible beams at their pedicles. To evaluate the stress distribution at the L4-L5 level, a finite element sub-model was employed. Predicted resultant moments and forces from the detailed musculoskeletal model were applied at the L4 vertebra (through a rigid plate attached to the upper endplate at L4), and the L5 vertebra was fixed (at its lower endplate plate). In the fusion simulation, the nucleus pulpous as well as a part of the annulus fibrosus (posterolateral region) were removed. A polyetheretherketone (PEEK) cage was diagonally placed within the available disc space and filled with bone graft. A contact interaction between the cage and adjacent bones with a friction coefficient of 0.2 was assumed. A spinal stabilizer system (pedicle screws, diameter of 6.5 mm, and rods, diameter of 5.5 mm) was assembled in the model, and screws were inserted through the pedicle and embedded in the vertebral body assuming attached interfaces.

Figure S1: Internal loads on the isolated L4-L5 sub-model were estimated from the musculoskeletal model.
